# Supplementary material for: Temozolomide chronotherapy in patients with glioblastoma: a retrospective single-institute study
Source: PubMed Central journal article supplement — Neurooncol Adv. 2021 Mar 2;3(1):vdab041. doi: 10.1093/noajnl/vdab041 (PMC8086242; doi:10.1093/noajnl/vdab041), 2021-03-02
Supplement: vdab041_suppl_supplementary_figure_1.pdf [file vdab041_suppl_supplementary_figure_1.pdf]

GBM patients seen at  
WUSM during  
1/1/2010~12/31/2018  
(n=498)

Not de novo GBM (n=31)  
Never received TMZ (n=189)  
Not treated at WUSM (n=40)

Lost to follow up after  
surgery (n=58)

de novo GBM patients  
with TMZ (n=180)

vital status missing (n=1)

IDH1/2 mutant (n=11)  
1p/19q co-deletion (n=2)

Total under analysis  
(n=166)
