# Supplementary figures and images for: Temozolomide chronotherapy in patients with glioblastoma: a retrospective single-institute study
Source: PubMed Central journal article supplement — Neurooncol Adv. 2021 Mar 2;3(1):vdab041. doi: 10.1093/noajnl/vdab041 (PMC8086242; doi:10.1093/noajnl/vdab041), 2021-03-02

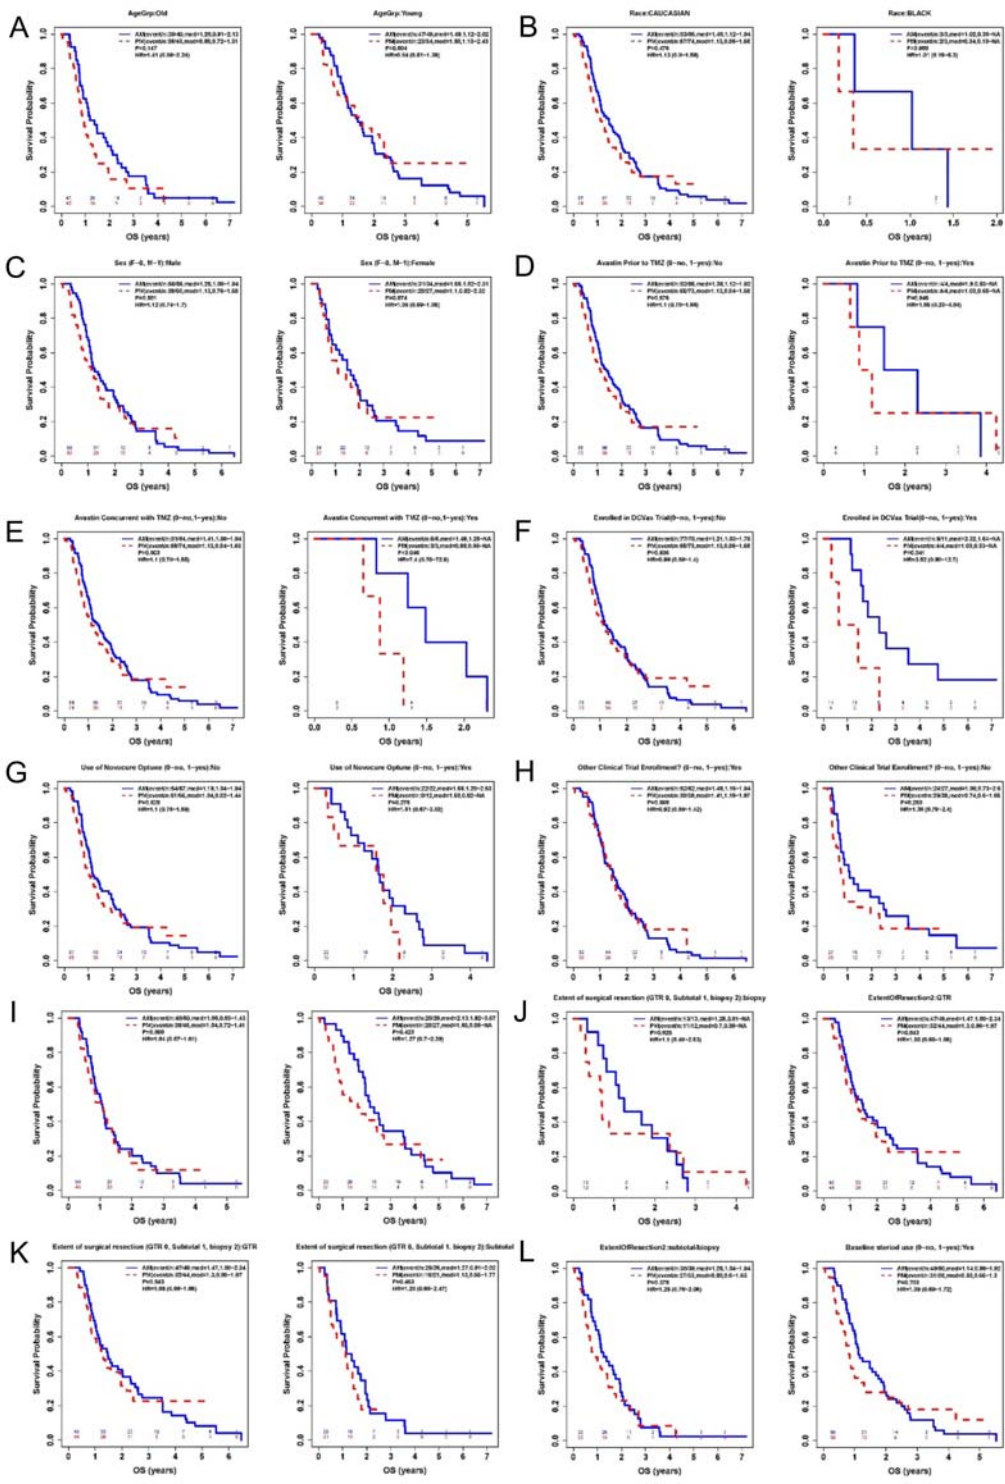

Supplement: vdab041_suppl_supplementary_figure_2.pdf [file vdab041_suppl_supplementary_figure_2.pdf]
